# Supplementary material
Source: publisher figshare collection journal article supplement (https://acs.figshare.com/ndownloader/files/22677440)
Supplement: Supplementary file 1 [file 22677440]

# Shock-Tube Laser Absorption Measurements of CO and H<sub>2</sub>O during Iso-Octane Combustion

O. Mathieu\*, S. P. Cooper, S. A. Turaifi, C. R. Mulvihill, T. M. Atherley, and E. L. Petersen

<sup>1</sup>J. Mike Walker '66 Department of Mechanical Engineering, Texas A&M University, College Station, TX, USA

<sup>2</sup>Department of Mechanical and Industrial Engineering, Louisiana State University, Baton Rouge, LA, USA

\*Corresponding Author Email: olivier.mathieu@tamu.edu

## Supplemental Material Section

A/ CO measurements

A.1/ CO mole fraction time histories and model comparison

A.1.1/ Model comparison at  $\phi = 0.5$

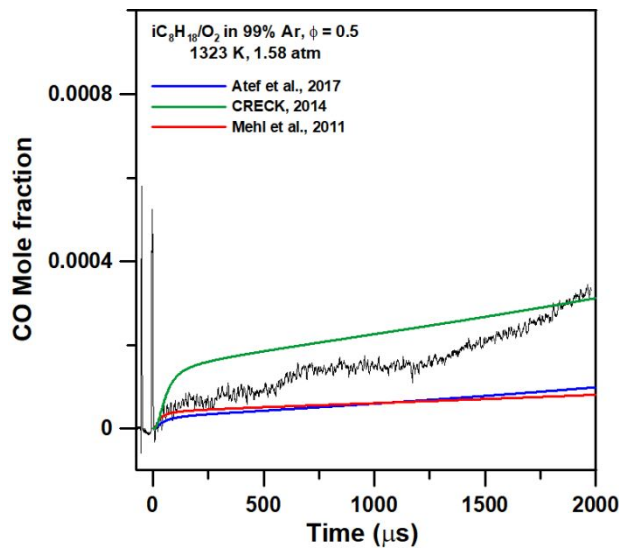

Figure SM1: CO time histories for an iso-octane/O<sub>2</sub> mixture in 99% inert gases at  $\phi = 0.5$ , 1323 K and 1.58 atm.

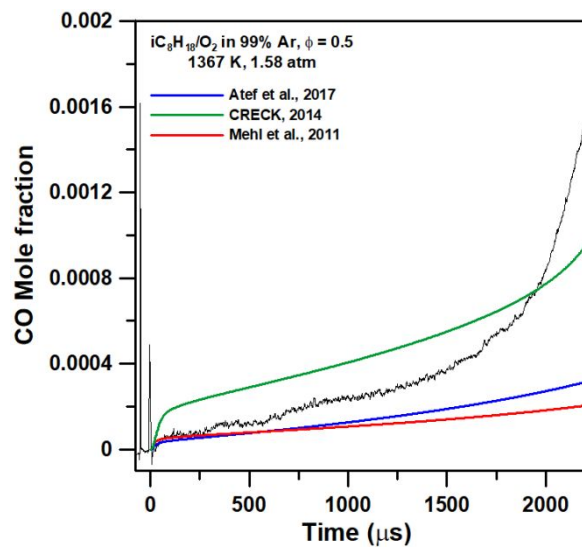

Figure SM2: CO time histories for an iso-octane/O<sub>2</sub> mixture in 99% inert gases at  $\phi = 0.5$ , 1367 K and 1.58 atm.

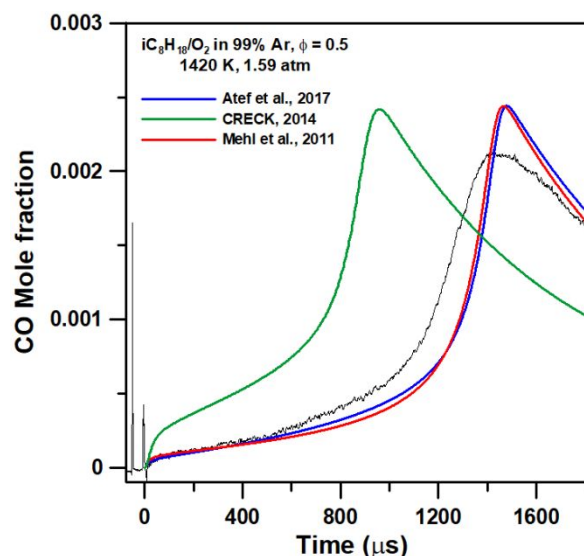

Figure SM3: CO time histories for an iso-octane/ $\text{O}_2$  mixture in 99% inert gases at  $\phi = 0.5$ , 1420 K and 1.59 atm.

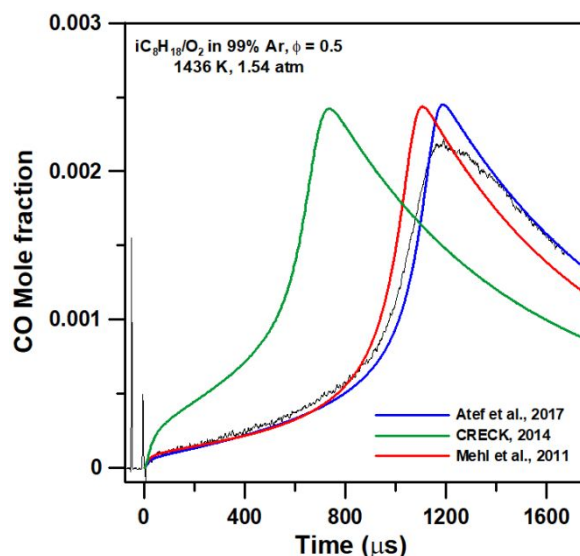

Figure SM4: CO time histories for an iso-octane/ $\text{O}_2$  mixture in 99% inert gases at  $\phi = 0.5$ , 1436 K and 1.54 atm.

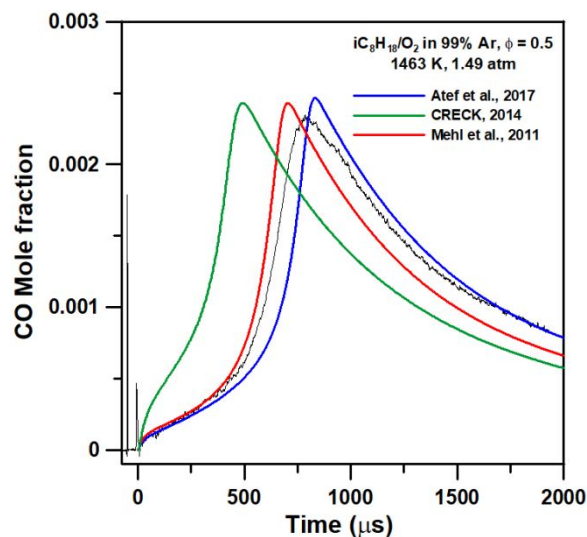

Figure SM5: CO time histories for an iso-octane/ $\text{O}_2$  mixture in 99% inert gases at  $\phi = 0.5$ , 1463 K and 1.49 atm.

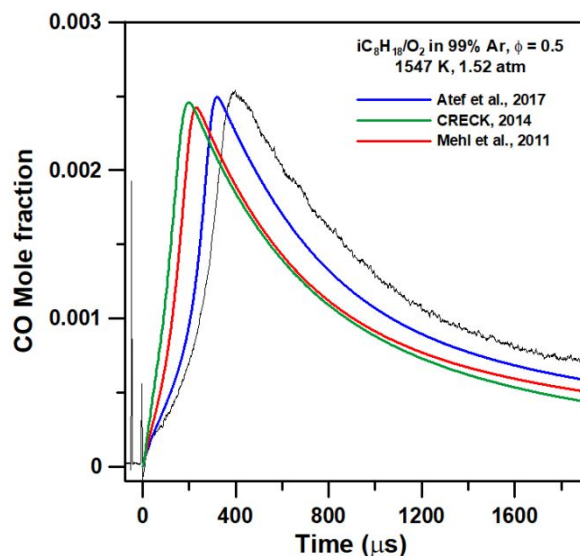

Figure SM6: CO time histories for an iso-octane/ $\text{O}_2$  mixture in 99% inert gases at  $\phi = 0.5$ , 1547 K and 1.52 atm.

# A.1.2/ Model comparison at $\phi = 1.0$

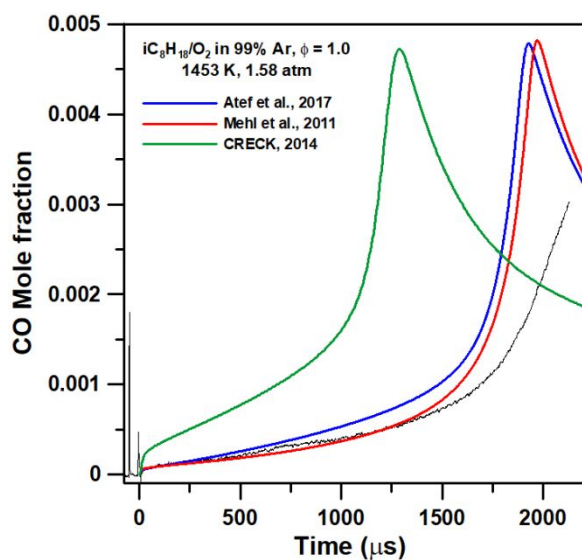

Figure SM7: CO time histories for an iso-octane/ $\text{O}_2$  mixture in 99% inert gases at  $\phi = 1.0$ , 1453 K and 1.58 atm.

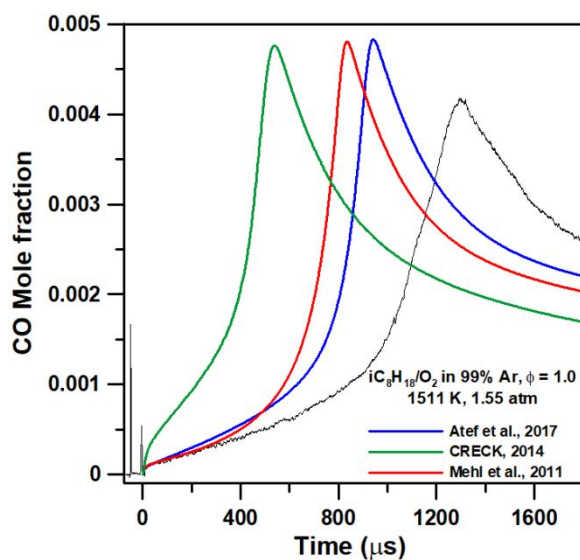

Figure SM8: CO time histories for an iso-octane/ $\text{O}_2$  mixture in 99% inert gases at  $\phi = 1.0$ , 1511 K and 1.55 atm.

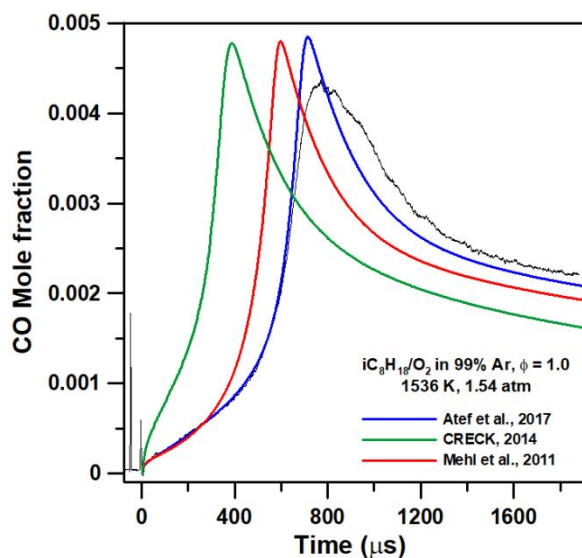

Figure SM9: CO time histories for an iso-octane/ $\text{O}_2$  mixture in 99% inert gases at  $\phi = 1.0$ , 1536 K and 1.54 atm.

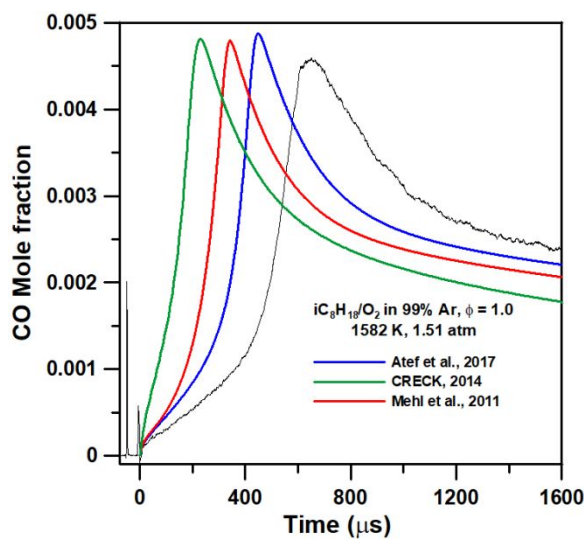

Figure SM10: CO time histories for an iso-octane/ $\text{O}_2$  mixture in 99% inert gases at  $\phi = 1.0$ , 1582 K and 1.51 atm.

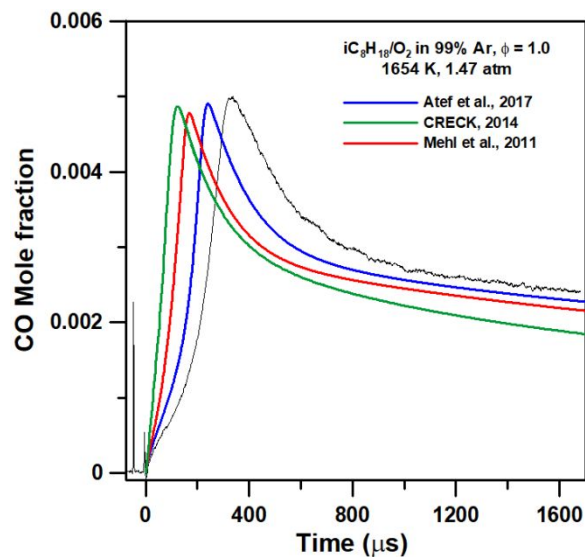

Figure SM11: CO time histories for an iso-octane/ $O_2$  mixture in 99% inert gases at  $\phi = 1.0$ , 1654 K and 1.47 atm.

#### A.1.3/ Model comparison at $\phi = 2.0$

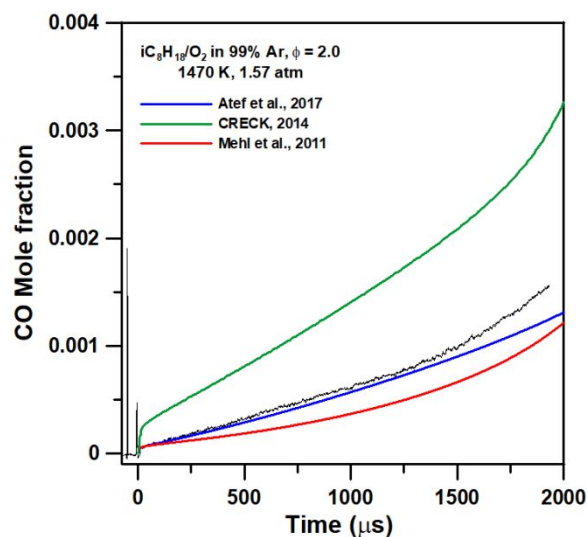

Figure SM12: CO time histories for an iso-octane/ $O_2$  mixture in 99% inert gases at  $\phi = 2.0$ , 1470 K and 1.57 atm.

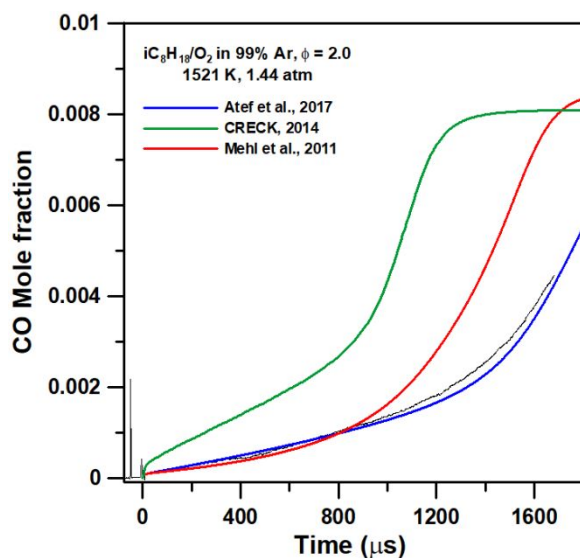

Figure SM13: CO time histories for an iso-octane/ $O_2$  mixture in 99% inert gases at  $\phi = 2.0$ , 1521 K and 1.44 atm.

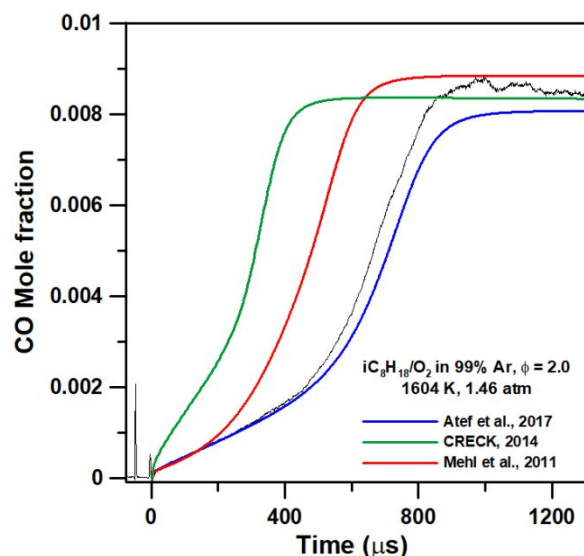

Figure SM14: CO time histories for an iso-octane/ $O_2$  mixture in 99% inert gases at  $\phi = 2.0$ , 1604 K and 1.46 atm.

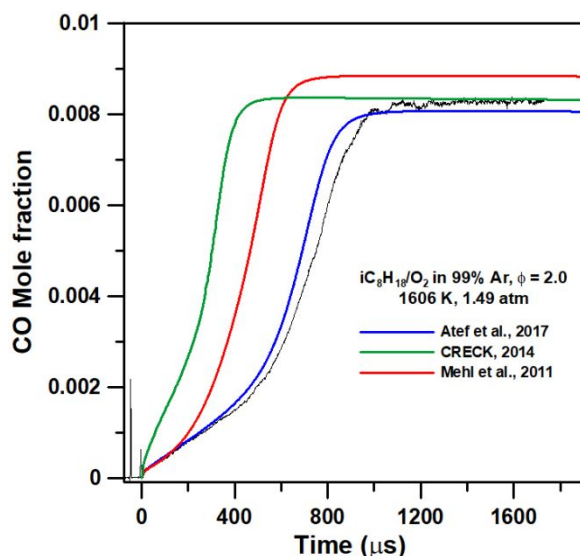

Figure SM15: CO time histories for an iso-octane/ $O_2$  mixture in 99% inert gases at  $\phi = 2.0$ , 1606 K and 1.49 atm.

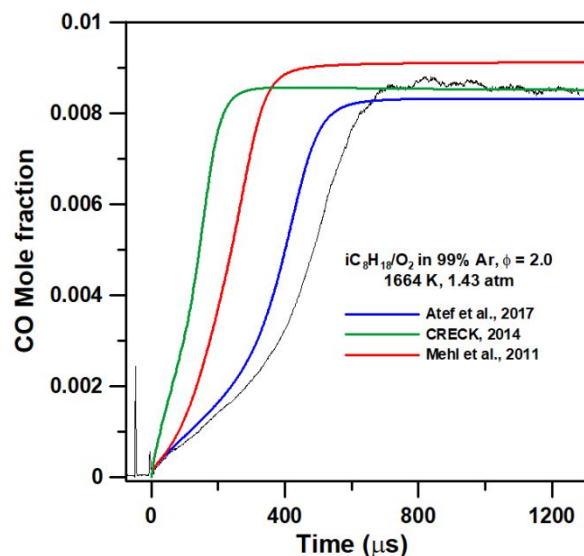

Figure SM16: CO time histories for an iso-octane/ $O_2$  mixture in 99% inert gases at  $\phi = 2.0$ , 1664 K and 1.43 atm.

## A.2/ CO induction delay time and time-at-peak CO

Table S1: CO induction delay time ( $\tau_{\text{ind}}$ ), time-at-peak CO ( $\tau_{\text{peak}}$ ), and associated conditions behind reflected shock waves for a mixture of iso-octane/O<sub>2</sub> in 99% Ar diluent at  $\phi = 0.5$ .

| <b>T<sub>5</sub> (K)</b> | <b>P<sub>5</sub> (atm)</b> | <b><math>\tau_{\text{ind}}</math> (<math>\mu\text{s}</math>)</b> | <b><math>\tau_{\text{peak}}</math> (<math>\mu\text{s}</math>)</b> |
|--------------------------|----------------------------|------------------------------------------------------------------|-------------------------------------------------------------------|
| 1411                     | 1.62                       | 1237.8                                                           | 1690                                                              |
| 1420                     | 1.59                       | 995                                                              | 1422                                                              |
| 1436                     | 1.54                       | 853.6                                                            | 1186                                                              |
| 1463                     | 1.49                       | 526                                                              | 788                                                               |
| 1504                     | 1.50                       | 325                                                              | 533                                                               |
| 1547                     | 1.52                       | 196                                                              | 396                                                               |
| 1601                     | 1.51                       | 85.3                                                             | 241                                                               |

Table S2: CO induction delay time ( $\tau_{\text{ind}}$ ), time-at-peak CO ( $\tau_{\text{peak}}$ ), and associated conditions behind reflected shock waves for a mixture of iso-octane/O<sub>2</sub> in 99% Ar diluent at  $\phi = 1.0$ .

| <b>T<sub>5</sub> (K)</b> | <b>P<sub>5</sub> (atm)</b> | <b><math>\tau_{\text{ind}}</math> (<math>\mu\text{s}</math>)</b> | <b><math>\tau_{\text{peak}}</math> (<math>\mu\text{s}</math>)</b> |
|--------------------------|----------------------------|------------------------------------------------------------------|-------------------------------------------------------------------|
| 1496                     | 1.57                       | 1144                                                             | 1464                                                              |
| 1511                     | 1.55                       | 871                                                              | 1295                                                              |
| 1536                     | 1.54                       | 517                                                              | 776                                                               |
| 1582                     | 1.51                       | 416                                                              | 656                                                               |
| 1625                     | 1.49                       | 194                                                              | 437                                                               |
| 1654                     | 1.47                       | 159                                                              | 332                                                               |
| 1706                     | 1.44                       | 89                                                               | 222                                                               |

Table S3: CO induction delay time ( $\tau_{\text{ind}}$ ) and associated conditions behind reflected shock waves for a mixture of iso-octane/O<sub>2</sub> in 99% Ar diluent at  $\phi = 2.0$ .

| <b>T<sub>5</sub> (K)</b> | <b>P<sub>5</sub> (atm)</b> | <b><math>\tau_{\text{ind}}</math> (<math>\mu\text{s}</math>)</b> |
|--------------------------|----------------------------|------------------------------------------------------------------|
| 1557                     | 1.44                       | 700                                                              |
| 1604                     | 1.46                       | 446                                                              |
| 1606                     | 1.49                       | 501                                                              |
| 1664                     | 1.43                       | 301                                                              |
| 1718                     | 1.37                       | 118                                                              |
| 1815                     | 1.37                       | 29                                                               |

B/ H<sub>2</sub>O measurements

B.1/ H<sub>2</sub>O mole fraction time histories and model comparison

B.1.1/ Model comparison at  $\phi = 0.5$

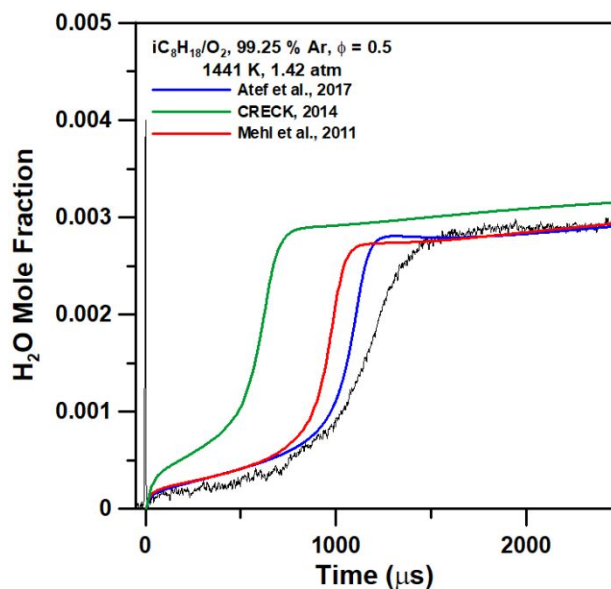

Figure SM17: H<sub>2</sub>O time histories for an iso-octane/O<sub>2</sub> mixture in 99% Ar at  $\phi = 0.5$ , 1441 K and 1.42 atm.

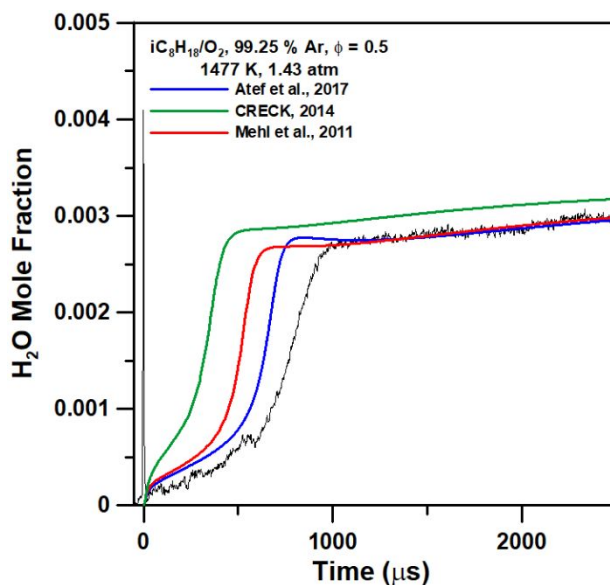

Figure SM18: H<sub>2</sub>O time histories for an iso-octane/O<sub>2</sub> mixture in 99% Ar at  $\phi = 0.5$ , 1477 K and 1.43 atm.

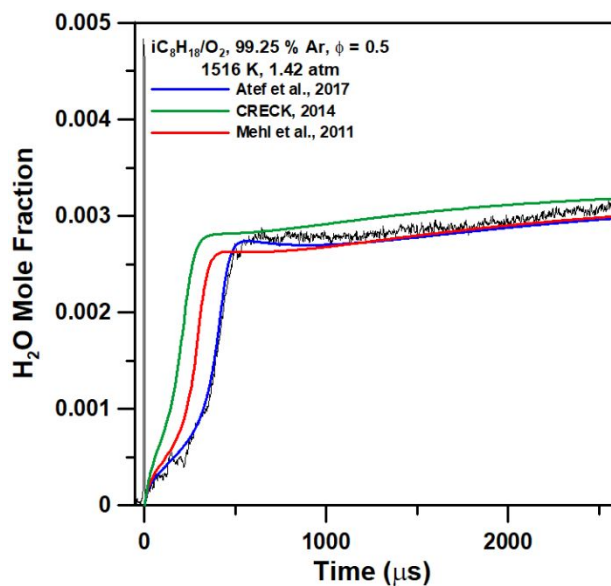

Figure SM19: H<sub>2</sub>O time histories for an iso-octane/O<sub>2</sub> mixture in 99% Ar at  $\phi = 0.5$ , 1516 K and 1.42 atm.

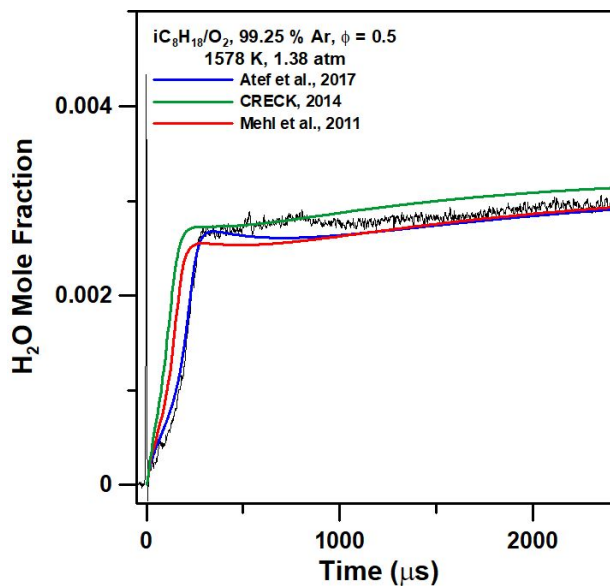

Figure SM20: H<sub>2</sub>O time histories for an iso-octane/O<sub>2</sub> mixture in 99% Ar at  $\phi = 0.5$ , 1578 K and 1.38 atm.



### B.1.2/ Model comparison at $\phi = 1.0$

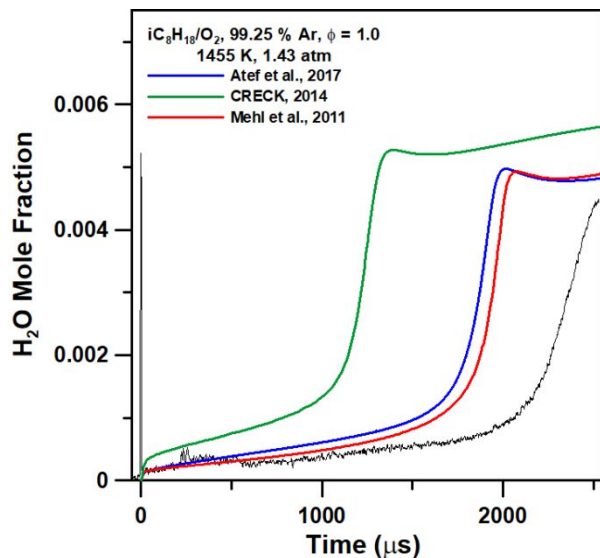

Figure SM21: H<sub>2</sub>O time histories for an iso-octane/O<sub>2</sub> mixture in 99% Ar at  $\phi = 1.0$ , 1455 K and 1.43 atm.

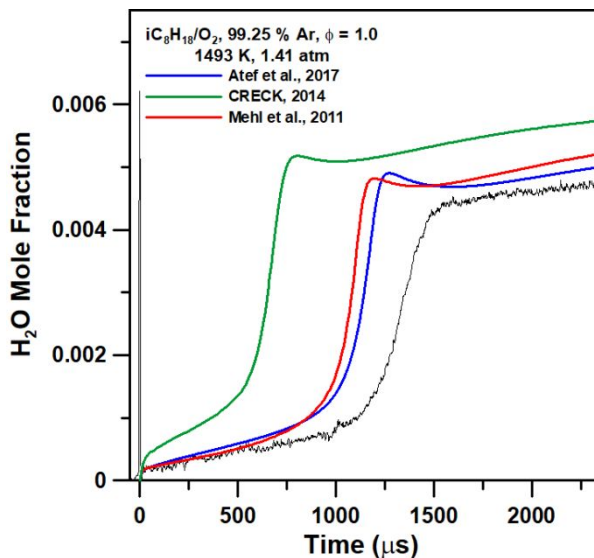

Figure SM22: H<sub>2</sub>O time histories for an iso-octane/O<sub>2</sub> mixture in 99% Ar at  $\phi = 1.0$ , 1493 K and 1.41 atm.

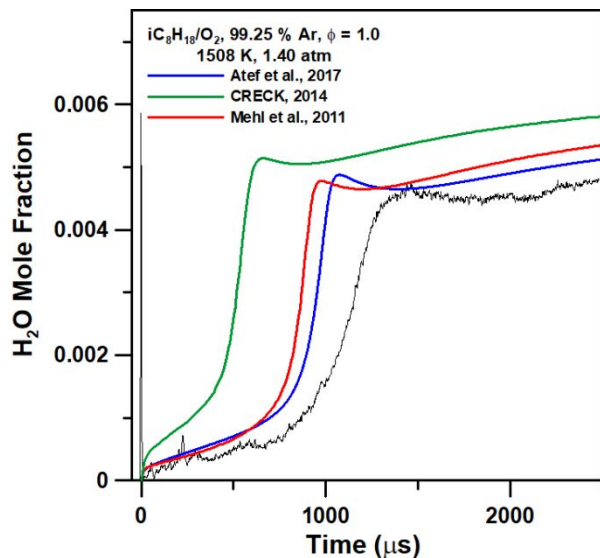

Figure SM23: H<sub>2</sub>O time histories for an iso-octane/O<sub>2</sub> mixture in 99% Ar at  $\phi = 1.0$ , 1508 K and 1.40 atm.

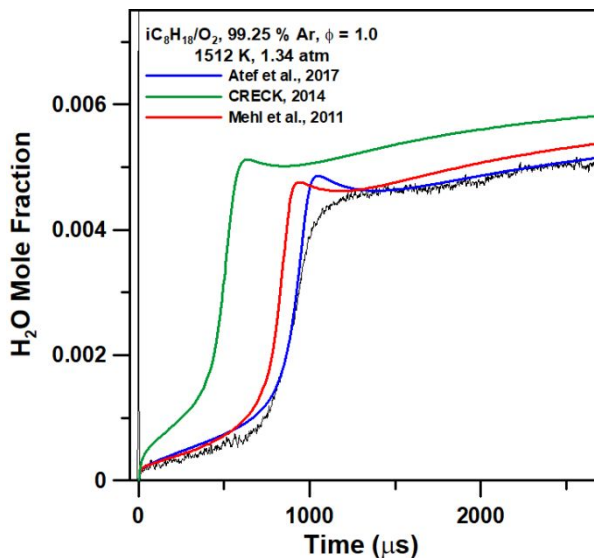

Figure SM24: H<sub>2</sub>O time histories for an iso-octane/O<sub>2</sub> mixture in 99% Ar at  $\phi = 1.0$ , 1512 K and 1.34 atm.



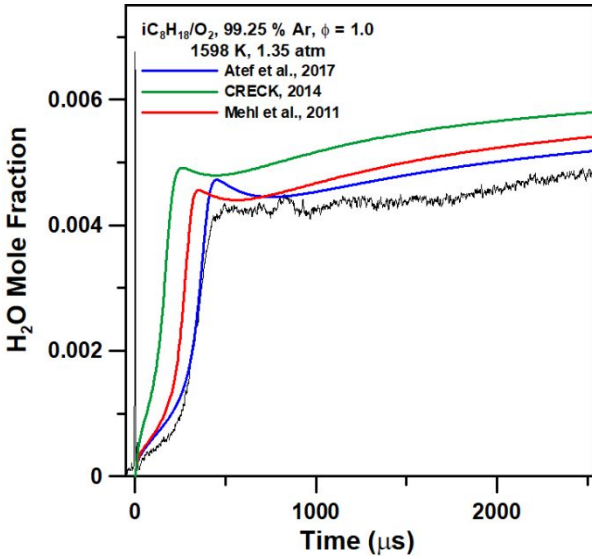

Figure SM25: H<sub>2</sub>O time histories for an iso-octane/O<sub>2</sub> mixture in 99% Ar at  $\phi = 1.0$ , 1598 K and 1.35 atm.

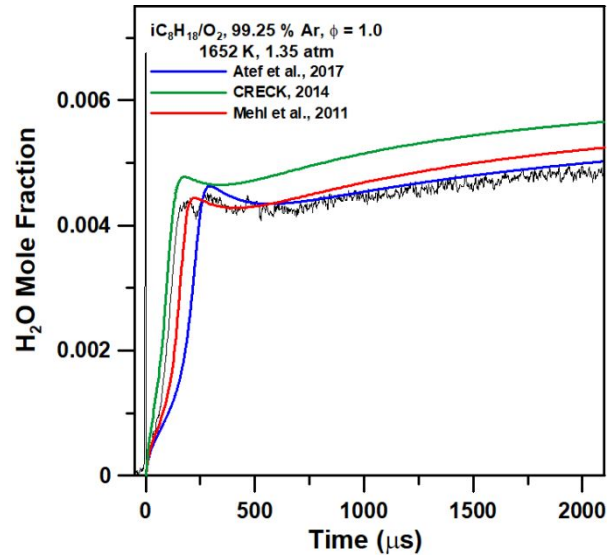

Figure SM26: H<sub>2</sub>O time histories for an iso-octane/O<sub>2</sub> mixture in 99% Ar at  $\phi = 1.0$ , 1652 K and 1.35 atm.

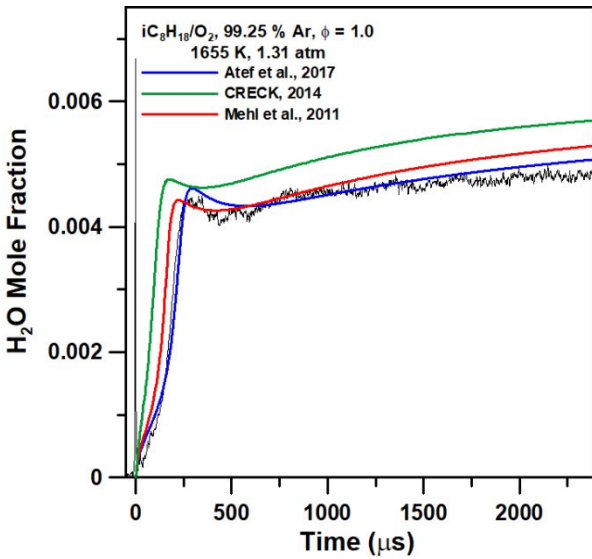

Figure SM27: H<sub>2</sub>O time histories for an iso-octane/O<sub>2</sub> mixture in 99% Ar at  $\phi = 1.0$ , 1655 K and 1.31 atm.

### B.1.3/ Model comparison at $\phi = 2.0$

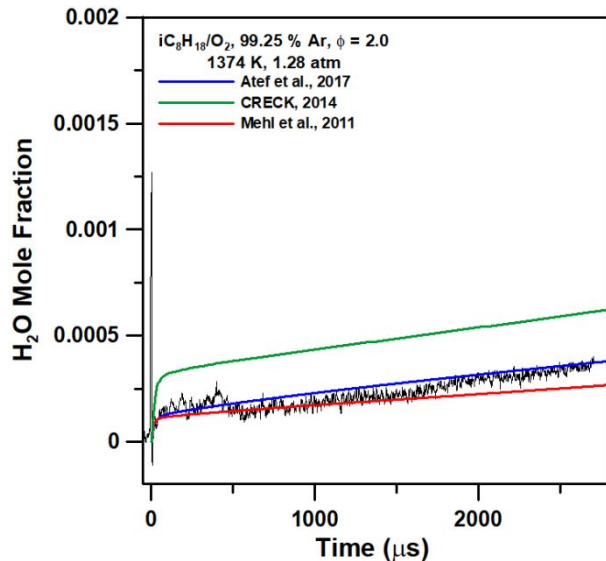

Figure SM28: H<sub>2</sub>O time histories for an iso-octane/O<sub>2</sub> mixture in 99% Ar at  $\phi = 2.0$ , 1374 K and 1.28 atm.

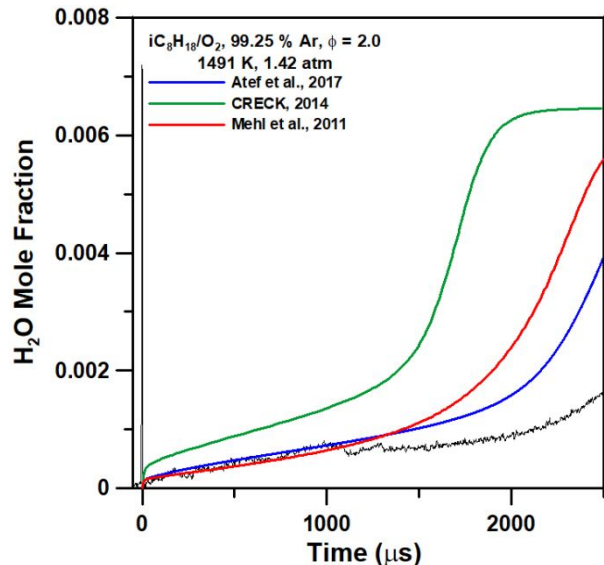

Figure SM29: H<sub>2</sub>O time histories for an iso-octane/O<sub>2</sub> mixture in 99% Ar at  $\phi = 2.0$ , 1491 K and 1.42 atm.

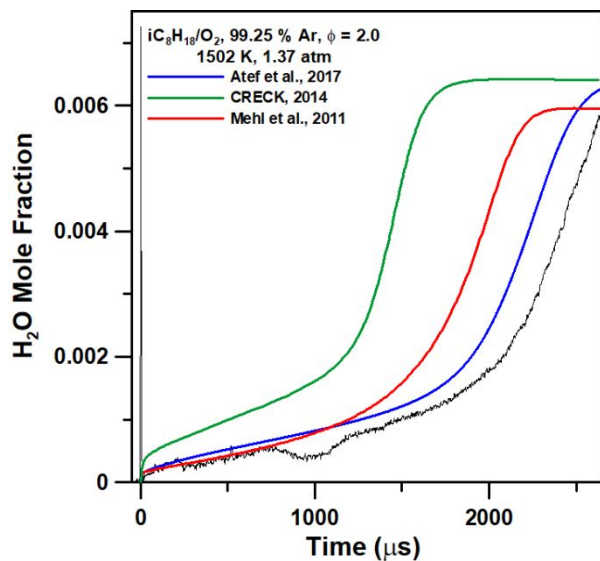

Figure SM29: H<sub>2</sub>O time histories for an iso-octane/O<sub>2</sub> mixture in 99% Ar at  $\phi = 2.0$ , 1502 K and 1.37 atm.

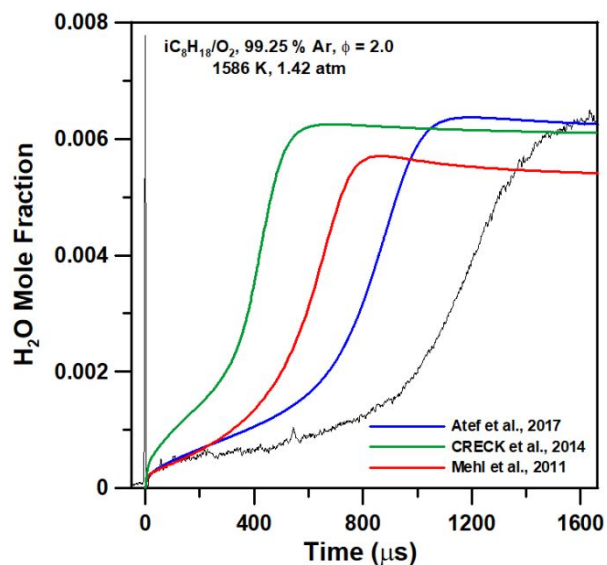

Figure SM30: H<sub>2</sub>O time histories for an iso-octane/O<sub>2</sub> mixture in 99% Ar at  $\phi = 2.0$ , 1586 K and 1.42 atm.

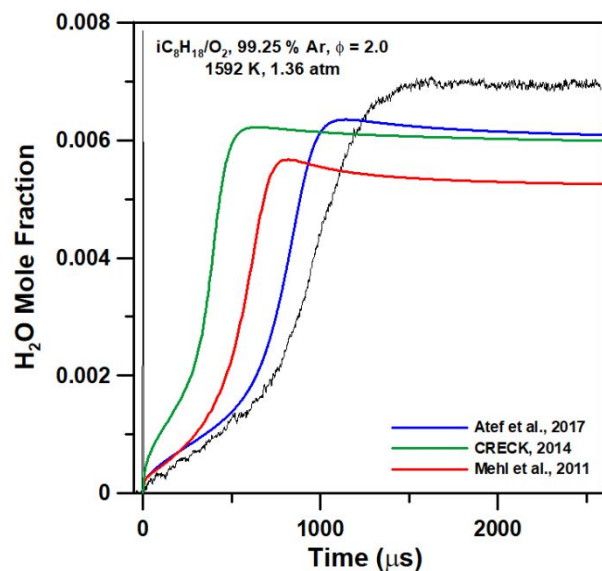

Figure SM31:  $\text{H}_2\text{O}$  time histories for an iso-octane/ $\text{O}_2$  mixture in 99% Ar at  $\phi = 2.0$ , 1592 K and 1.36 atm.

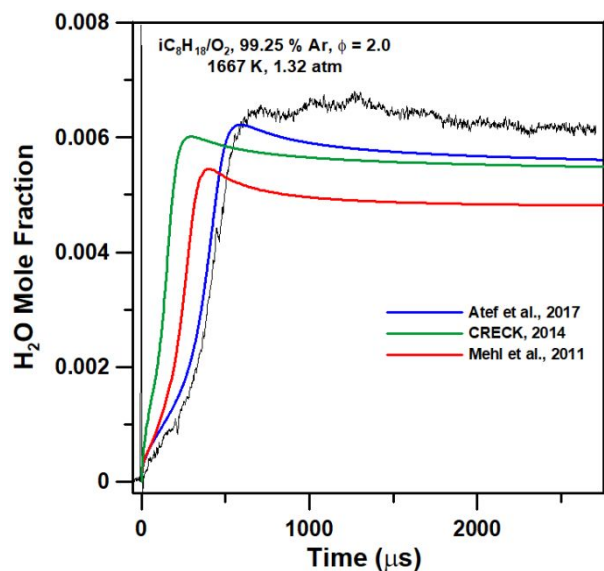

Figure SM32:  $\text{H}_2\text{O}$  time histories for an iso-octane/ $\text{O}_2$  mixture in 99% Ar at  $\phi = 2.0$ , 1667 K and 1.32 atm.

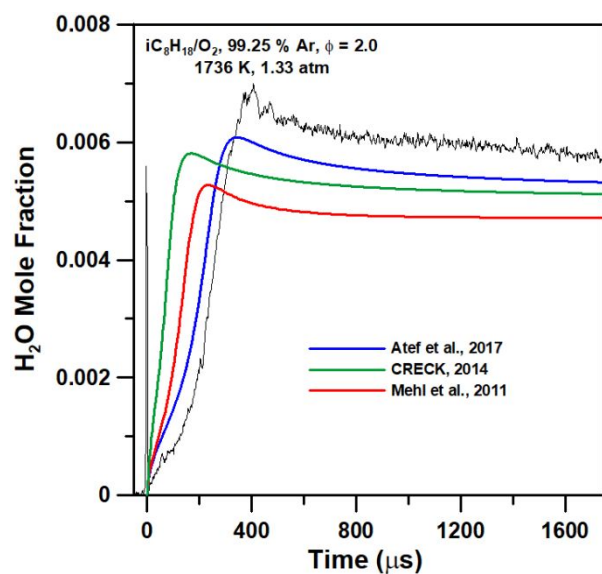

Figure SM33:  $\text{H}_2\text{O}$  time histories for an iso-octane/ $\text{O}_2$  mixture in 99% Ar at  $\phi = 2.0$ , 1736 K and 1.33 atm.

## B.2/ H<sub>2</sub>O induction delay time

Table S4: H<sub>2</sub>O induction delay time ( $\tau_{\text{ind}}$ ) and associated conditions behind reflected shock waves for a mixture of iso-octane/O<sub>2</sub> in 99% Ar at  $\phi = 0.5$ .

| T <sub>5</sub> (K) | P <sub>5</sub> (atm) | $\tau_{\text{ind}}$ ( $\mu\text{s}$ ) |
|--------------------|----------------------|---------------------------------------|
| 1403               | 1.41                 | 1612.0                                |
| 1405               | 1.43                 | 1486.5                                |
| 1408               | 1.48                 | 1895.7                                |
| 1441               | 1.42                 | 883.5                                 |
| 1477               | 1.43                 | 547.8                                 |
| 1516               | 1.42                 | 278.0                                 |
| 1532               | 1.39                 | 167.5                                 |
| 1578               | 1.38                 | 123.6                                 |
| 1600               | 1.35                 | 77.4                                  |
| 1687               | 1.37                 | 40.8                                  |

Table S5: H<sub>2</sub>O induction delay time ( $\tau_{\text{ind}}$ ) and associated conditions behind reflected shock waves for a mixture of iso-octane/O<sub>2</sub> in 99% Ar at  $\phi = 1.0$ .

| T <sub>5</sub> (K) | P <sub>5</sub> (atm) | $\tau_{\text{ind}}$ ( $\mu\text{s}$ ) |
|--------------------|----------------------|---------------------------------------|
| 1455               | 1.43                 | 2073.6                                |
| 1460               | 1.40                 | 1612                                  |
| 1493               | 1.41                 | 1126.6                                |
| 1508               | 1.4                  | 805                                   |
| 1512               | 1.34                 | 725.1                                 |
| 1543               | 1.33                 | 400                                   |
| 1598               | 1.35                 | 229.6                                 |
| 1652               | 1.35                 | 107.9                                 |
| 1655               | 1.31                 | 109.8                                 |
| 1728               | 1.36                 | 53.4                                  |

Table S6: H<sub>2</sub>O induction delay time ( $\tau_{\text{ind}}$ ) and associated conditions behind reflected shock waves for a mixture of iso-octane/O<sub>2</sub> in 99% Ar at  $\phi = 2.0$ .

| T <sub>5</sub> (K) | P <sub>5</sub> (atm) | $\tau_{\text{ind}}$ ( $\mu\text{s}$ ) |
|--------------------|----------------------|---------------------------------------|
| 1502               | 1.37                 | 1921                                  |
| 1548               | 1.41                 | 1217                                  |
| 1586               | 1.42                 | 863                                   |
| 1592               | 1.36                 | 598                                   |
| 1634               | 1.35                 | 425                                   |
| 1667               | 1.32                 | 230                                   |
| 1736               | 1.33                 | 141                                   |
| 1793               | 1.32                 | 59                                    |

# C. Chemical Analysis

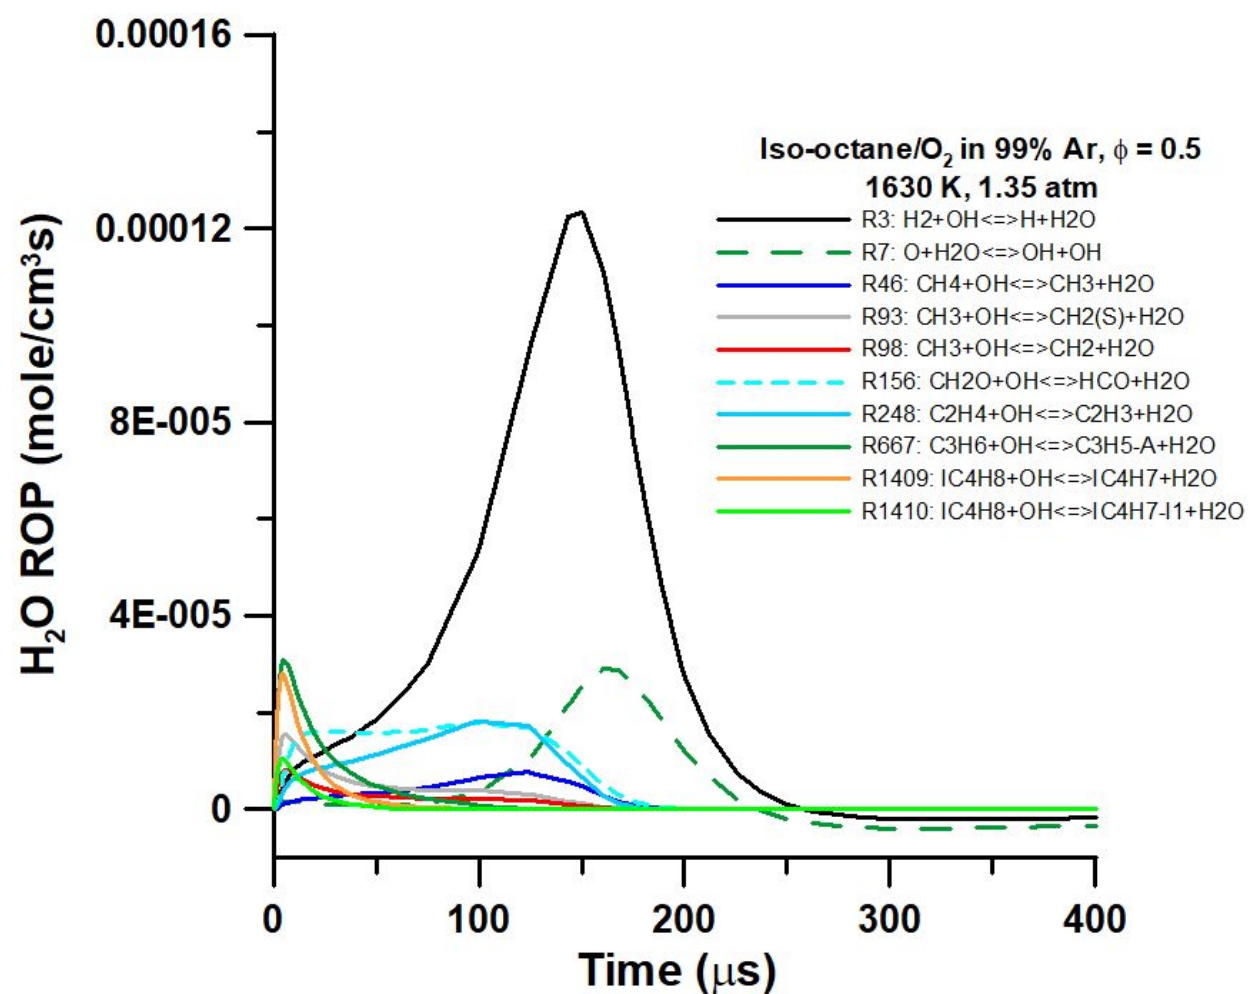

Figure SM 34: Rate of production analysis for water using the Atef et al. model from a mixture of iso-octane/O<sub>2</sub>,  $\phi = 0.5$ , in 99% Ar at 1630 K and 1.35 atm.

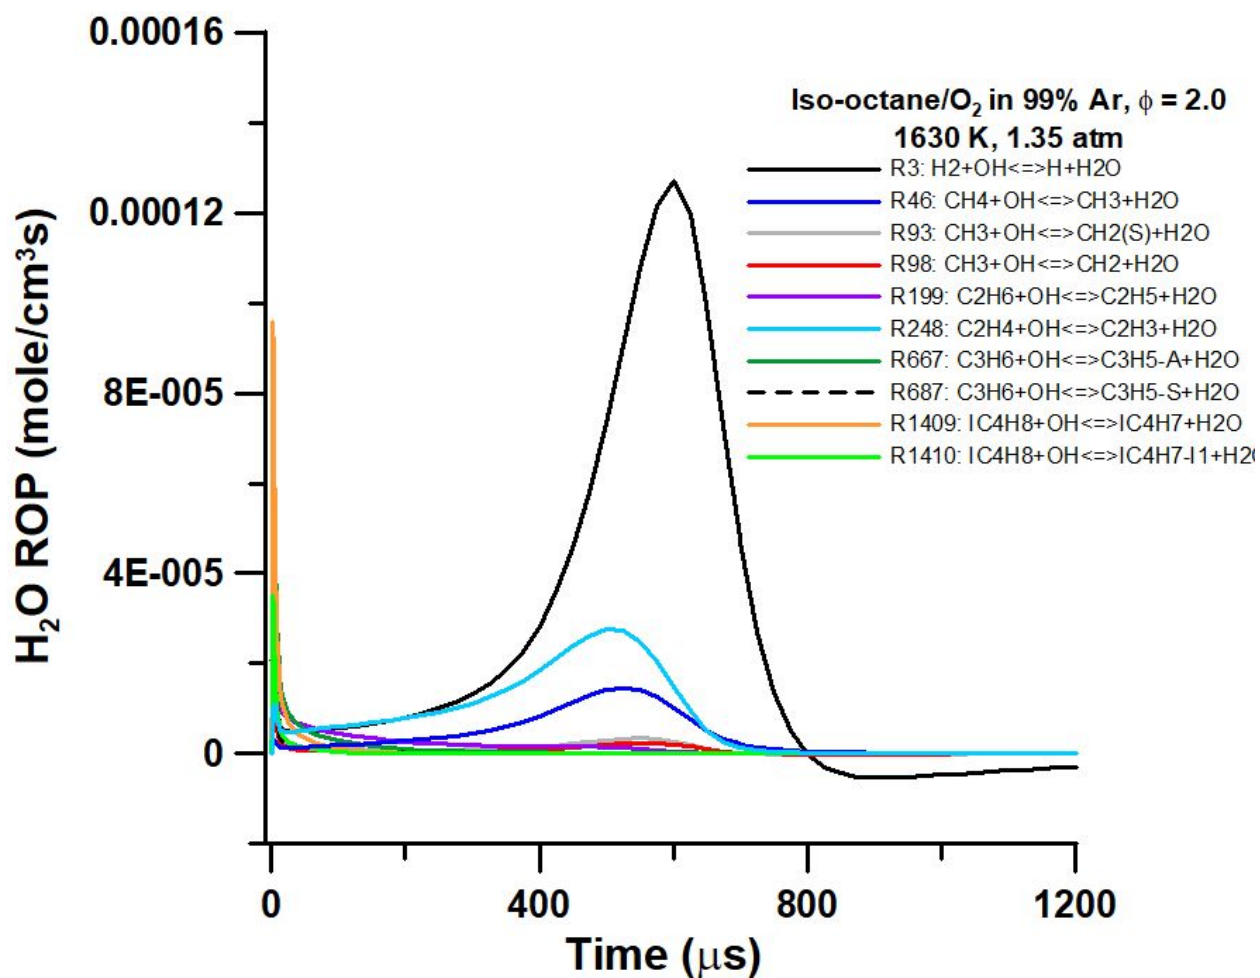

Figure SM 35: Rate of production analysis for water using the Atef et al. model from a mixture of iso-octane/O<sub>2</sub>,  $\phi = 2.0$ , in 99% Ar at 1630 K and 1.35 atm.
